# Supplementary material for: Tracing near-surface runoff in a pre-Alpine headwater catchment
Source: Copernicus journal article supplement (doi:10.5194/egusphere-2025-1677), 2025-04-15
Supplement: Supplementary file 1 [file egusphere-2025-1677-supplement.pdf]

# Tracing near-surface runoff in a pre-Alpine headwater catchment

Anna Leuteritz<sup>1\*</sup>, Victor A. Gauthier<sup>1\*</sup>, Ilja van Meerveld<sup>1</sup>

<sup>1</sup>Department of Geography, Zurich University, Zurich, Switzerland

\* joined first authorship

Correspondence to: V.A. Gauthier (victor.gauthier@lilo.org) and A. Leuteritz (anna.leuteritz@geo.uzh.ch)

**Table S.1: Average of the soil water content in % from three different sensors in the plots, at two depths 5 and 15 cm, display before experiment (BE) and at steady state (SS). The data are for the celerity and velocity experiment for the clearing and the grassland plots.**

|                  | 5cm    |        | 15 cm  |        | 25 cm  |        |
|------------------|--------|--------|--------|--------|--------|--------|
|                  | BE (%) | SS (%) | BE (%) | SS (%) | BE (%) | SS (%) |
| <i>Clearing</i>  |        |        |        |        |        |        |
| Celerity         | 41     | 51     | 57     | 58     | 51     | 56     |
| Velocity         | 41     | 51     | 57     | 58     | 52     | 56     |
| <i>Grassland</i> |        |        |        |        |        |        |
| Celerity         | 78     | 75     | 59     | 59     | 55     | 55     |
| Velocity         | 76     | 76     | 58     | 60     | 54     | 54     |

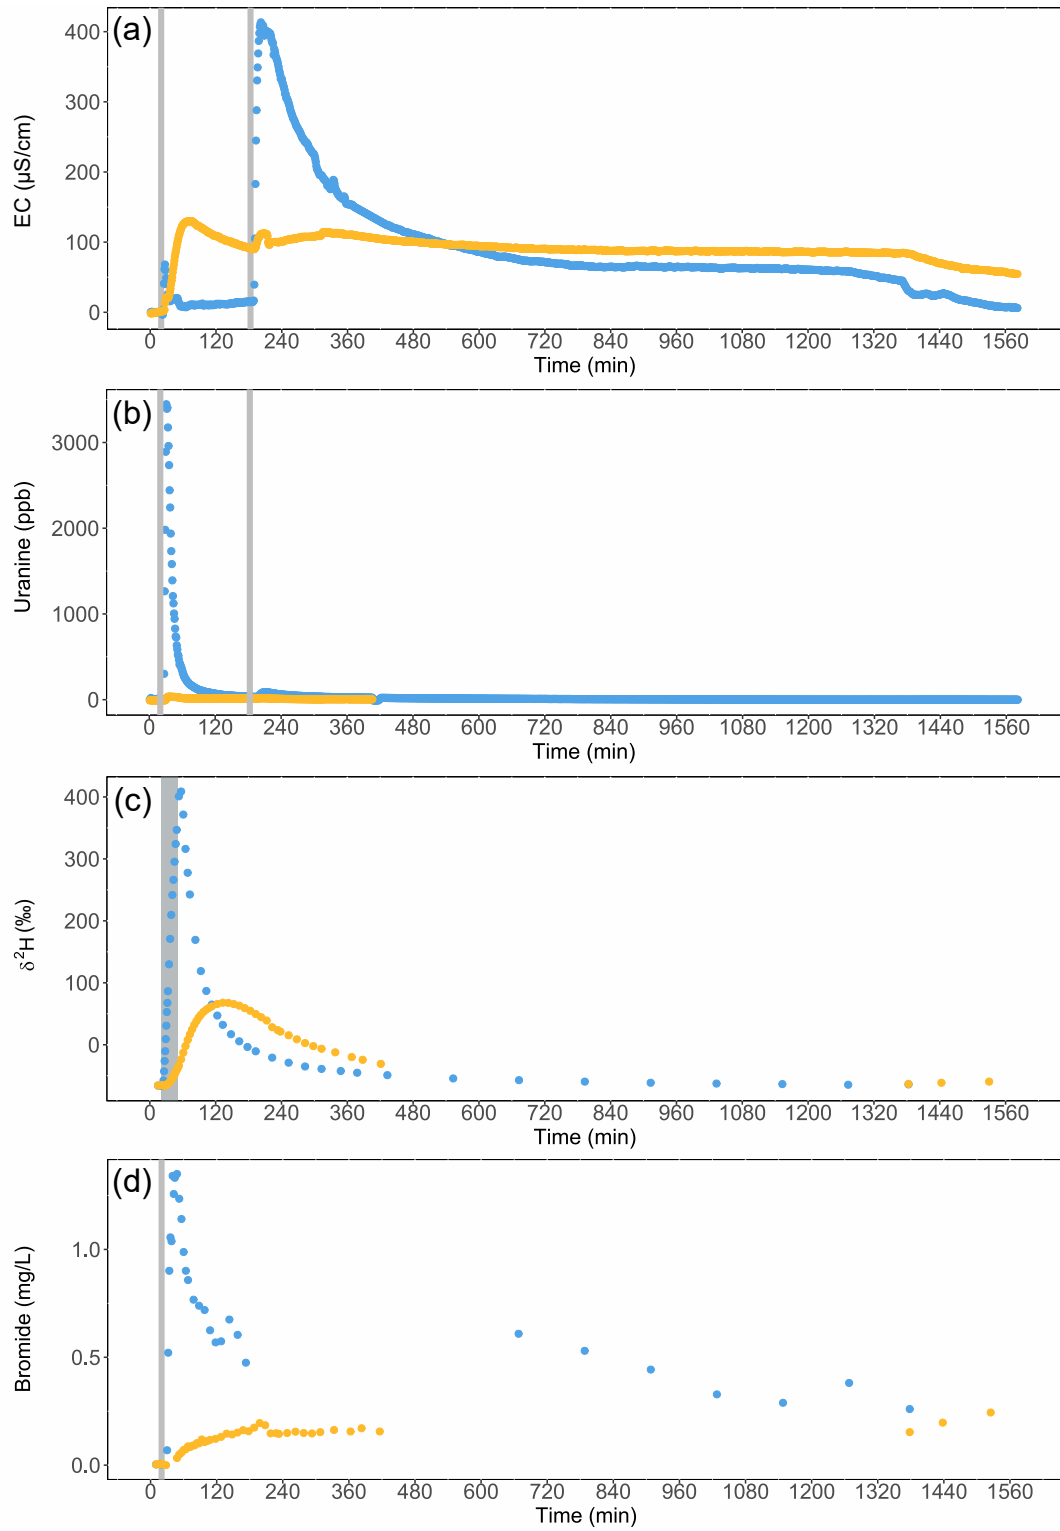

**Figure S.1: Breakthrough curves for the lines of NaCl (EC minus background EC; first row) and uranine (second row), the deuterium-labelled water that was added via the sprinklers ( $\delta^2\text{H}$ ; third row), and the NaBr tracer that was applied to the subsurface (forth row) for OF (blue) and TIF (orange) for plot in the natural clearing. Note that time 0 corresponds to minute 138 in Figure 4a. The gray shaded area indicates the time of the tracer application.**
